# Supplementary material for: Clustered Coding Variants in the Glutamate Receptor Complexes of Individuals with Schizophrenia and Bipolar Disorder
Source: PLoS One. 2011 Apr 29;6(4):e19011. doi: 10.1371/journal.pone.0019011 (PMC3084736; doi:10.1371/journal.pone.0019011)
Supplement: Datasheet S3 — details of the statistics for identifying nsSNP clusters and estimation of their significance by randomization analysis. (XLS) [file pone.0019011.s004.xls]

## Sheet: RandSuperprotein
Disease-only SNP distributions
	Poisson ranking P value	Start	End	Extreme distribution P value	BH Corrected P
GRM1	1.10081e-05	548	604	0.0095	0.1045
DLG1	0.000375006	67	125	0.2176	1
GRIN2A	0.00284583	1060	1178	0.5873	1
DLG2	1	506	506	1	1
DLG24	1	63	63	1	1
DLG3	1	799	799	1	1
DLG4	1	53	595	1	1
GRIA1	1	371	371	1	1
GRIA2	1	N/A	N/A	1	1
GRIN1	1	364	513	1	1
GRIN2B	1	5	1019	1	1
					1
Disease-SNP distributions
	Poisson ranking P value	Start	End	Extreme distribution P value	BH Corrected P
GRM1	6.82512e-06	548	604	0.0093	0.1023
DLG1	0.00023401	67	717	0.1746	0.9603
GRIN2A	0.0021641	1060	1178	0.7842	1
DLG4	0.00722095	520	606	0.9633	1
DLG3	0.014345	102	131	1	1
GRIN2B	0.394865	1019	1322	1	1
DLG2	1	506	699	1	1
DLG24	1	63	63	1	1
GRIA1	1	371	371	1	1
GRIA2	1	268	268	1	1
GRIN1	1	364	513	1	1
					1
LBC-SNP distributions
	Poisson ranking P value	Start	End	Extreme distribution P value	BH Corrected P
GRM1	0.000479163	358	1069	0.2265	1
DLG1	0.00103012	666	717	0.5509	1
GRIN2A	0.00306343	1276	1351	0.7982	1
DLG3	0.010315	102	131	0.9996	1
DLG4	0.0401659	520	718	1	1
GRIN2B	0.524891	856	1322	1	1
DLG2	1	647	699	1	1
DLG24	1	13	13	1	1
GRIA1	1	40	280	1	1
GRIA2	1	268	268	1	1
GRIN1	1	N/A	N/A	1	1
					1

## Sheet: RandSuperprotein11Subregions
	Disease-SNP distributions
		Poisson ranking P value	Start	End	Extreme distribution P value	BH Corrected P
Disease-All	GRM1	6.82512e-06	548	604	0.00074	0.00814
Disease-All	DLG1	0.00023401	67	717	0.01438	0.07909
Disease-All	GRIN2A	0.0021641	1060	1178	0.15578	0.389483
Disease-All	DLG4	0.00722095	520	606	0.14163	0.389483
Disease-All	DLG3	0.014345	102	131	0.41454	0.911988
Disease-All	GRIN2B	0.394865	1019	1322	0.95691	1
Disease-All	DLG2	1	506	699	1	1
Disease-All	DLG24	1	63	63	1	1
Disease-All	GRIA1	1	371	371	1	1
Disease-All	GRIA2	1	268	268	1	1
Disease-All	GRIN1	1	364	513	1	1
						1
	Disease-only SNP distributions
		Poisson ranking P value	Start	End	Extreme distribution P value	BH Corrected P
Disease-only	GRM1	1.10081e-05	548	604	0.001	0.011			SCZ	503	0.385736
Disease-only	DLG1	0.000375006	67	125	0.01761	0.096855			BiP	263	0.201687
Disease-only	GRIN2A	0.00284583	1060	1178	0.09077	0.332823			Ctrl	538	0.412577	1.42379
Disease-only	GRIN2B	1	5	1019	1	1				1304
Disease-only	DLG4	1	53	595	1	1
Disease-only	DLG3	1	799	799	1	1
Disease-only	DLG24	1	63	63	1	1
Disease-only	DLG2	1	506	506	1	1			Idea: control-only SNPs vs disease-only SNPs
Disease-only	GRIA2	1	N/A	N/A	1	1			Multiply control-only SNP count by 1.42 to get expected disease-only count, eval by Poisson
Disease-only	GRIN1	1	364	513	1	1			Then randomize both and create a distr of cluster p-value ratios & see where observed cluster p value ratio falls in this distribution
Disease-only	GRIA1	1	371	371	1	1			However, if
						1			Maybe use Bayes: P(clustering) = P(density) * P(clustering | density)
	LBC-SNP distributions								P(density) is computed from Poisson statistics and observed control density; this does not change
		Poisson ranking P value	Start	End	Extreme distribution P value	BH Corrected P
LBC-All	GRM1	0.000479163	358	1069	0.02378	0.26158		0.0420521
LBC-All	DLG1	0.00103012	666	717	0.05335	0.293425		0.330084
LBC-All	GRIN2A	0.00306343	1276	1351	0.15555	0.57035		0.583542
LBC-All	DLG3	0.010315	102	131	0.31551	0.854898		3.16947
LBC-All	DLG4	0.0401659	520	718	0.38859	0.854898		2.57341
LBC-All	GRIN2B	0.524891	856	1322	0.92836	1		1.07717
LBC-All	GRIA1	1	40	280	1	1		1
LBC-All	DLG24	1	13	13	1	1		1
LBC-All	GRIN1	1	N/A	N/A	1	1		1
LBC-All	DLG2	1	647	699	1	1		1
LBC-All	GRIA2	1	268	268	1	1		1
						1

## Sheet: RandSuperprot11Subr_L_l_d_D
	Disease-SNP distributions
		Poisson ranking P value	Start	End	Extreme distribution P value
Disease-All	GRM1	5.61162e-06	548	604	0.00074
Disease-All	DLG1	0.000165849	67	717	0.01033
Disease-All	GRIN2A	0.00186895	1060	1178	0.14149
Disease-All	DLG4	0.00646167	520	606	0.12676
Disease-All	DLG3	0.0132829	102	131	0.38888
Disease-All	GRIN2B	0.375729	1019	1322	0.94737
Disease-All	DLG2	1	506	699	1
Disease-All	DLG24	1	63	63	1
Disease-All	GRIA1	1	371	371	1
Disease-All	GRIA2	1	268	268	1
Disease-All	GRIN1	1	364	513	1
	Disease-only SNP distributions
		Poisson ranking P value	Start	End	Extreme distribution P value
Disease-only	GRM1	8.05648e-06	548	604	0.00069
Disease-only	DLG1	0.000297253	67	125	0.01381
Disease-only	GRIN2A	0.00227372	1060	1178	0.07244
Disease-only	DLG2	1	506	506	1
Disease-only	DLG24	1	63	63	1
Disease-only	DLG3	1	799	799	1
Disease-only	DLG4	1	53	595	1
Disease-only	GRIA1	1	371	371	1
Disease-only	GRIA2	1	N/A	N/A	1
Disease-only	GRIN1	1	364	513	1
Disease-only	GRIN2B	1	5	1019	1
	LBC-SNP distributions
		Poisson ranking P value	Start	End	Extreme distribution P value
LBC-All	GRM1	0.000329503	358	1069	0.01739
LBC-All	DLG1	0.000895935	666	717	0.04678
LBC-All	GRIN2A	0.00267282	1276	1351	0.13824
LBC-All	DLG3	0.0094004	102	131	0.2917
LBC-All	DLG4	0.0355987	520	718	0.35263
LBC-All	GRIN2B	0.499062	856	1322	0.91075
LBC-All	DLG2	1	647	699	1
LBC-All	DLG24	1	13	13	1
LBC-All	GRIA1	1	40	280	1
LBC-All	GRIA2	1	268	268	1
LBC-All	GRIN1	1	N/A	N/A	1
	LBC-only SNP distributions
		Poisson ranking P value	Start	End	Extreme distribution P value
LBC-only	GRM1	0.000445164	358	458	0.01428
LBC-only	GRIN2A	0.00307376	1295	1351	0.12185
LBC-only	DLG1	1	87	87	1
LBC-only	DLG2	1	647	647	1
LBC-only	DLG24	1	13	13	1
LBC-only	DLG3	1	784	784	1
LBC-only	DLG4	1	N/A	N/A	1
LBC-only	GRIA1	1	40	280	1
LBC-only	GRIA2	1	N/A	N/A	1
LBC-only	GRIN1	1	N/A	N/A	1
LBC-only	GRIN2B	1	64	856	1

## Sheet: RandIndivIsoforms
	Disease-only SNP distributions									Disease-only nsSNPs				LBC-only nsSNPs
		Poisson ranking P value	Start	End	Extreme distribution P value			Gene	SNP positions	Start	End	Corrected clustering P value	SNP positions	Start	End	Corrected clustering P value
Disease-only	GRM1	4.44415e-05	548	604	0.00034	0.00374	0.00374	GRM1	548, 575, 602, 604	548	604	0.00374	358, 369, 458	358	458	1
Disease-only	DLG1	0.0023268	67	125	0.04469	0.245795	0.245795	DLG1	67, 68, 125	67	125	0.245795	87	87	87	1
Disease-only	GRIN2A	0.0131515	1060	1178	0.61697	2.26222	1	GRIN2A	1060, 1122, 1178	1060	1178	1	1295, 1351	1295	1351	1
Disease-only	DLG2	1	506	506	1	2.75	1	DLG2	506	506	506	1	647	647	647	1
Disease-only	DLG24	1	63	63	1	2.75	1	DLG24	63	63	63	1	13	13	13	1
Disease-only	DLG3	1	799	799	1	2.75	1	DLG3	799	799	799	1	784	784	784	1
Disease-only	DLG4	1	595	595	1	2.75	1	DLG4	595	595	595	1	N/A	N/A	N/A	1
Disease-only	GRIA1	1	371	371	1	2.75	1	GRIA1	371	371	371	1	40, 280	40	280	1
Disease-only	GRIA2	1	N/A	N/A	1	2.75	1	GRIA2	N/A	N/A	N/A	1	N/A	N/A	N/A	1
Disease-only	GRIN1	1	364	513	1	2.75	1	GRIN1	364, 513	364	513	1	N/A	N/A	N/A	1
Disease-only	GRIN2B	1	5	1019	1	2.75	1	GRIN2B	5, 1019	5	1019	1	64, 856	64	856	1
	LBC-only SNP distributions
		Poisson ranking P value	Start	End	Extreme distribution P value
LBC-only	GRM1	0.00897032	358	458	0.16908	1.85988	1
LBC-only	DLG1	1	87	87	1	3.66667	1
LBC-only	GRIN2A	0.00609355	1295	1351	0.21428	1.17854	1
LBC-only	DLG2	1	647	647	1	3.66667	1
LBC-only	DLG24	1	13	13	1	3.66667	1
LBC-only	DLG3	1	784	784	1	3.66667	1
LBC-only	DLG4	1	N/A	N/A	1	3.66667	1
LBC-only	GRIA1	1	40	280	1	3.66667	1
LBC-only	GRIA2	1	N/A	N/A	1	3.66667	1
LBC-only	GRIN1	1	N/A	N/A	1	3.66667	1
LBC-only	GRIN2B	1	64	856	1	3.66667	1
	Disease-SNP distributions									Disease (all nsSNPs)				LBC (all nsSNPs)
		Poisson ranking P value	Start	End	Extreme distribution P value			Gene	SNP positions	Start	End	Corrected clustering P value	SNP positions	Start	End	Corrected clustering P value
Disease-All	GRM1	7.86989e-05	548	604	0.00284	0.03124	0.03124	GRM1	548, 563, 575, 602, 604	548	604	0.03124	884, 909, 929	884	929	1
Disease-All	GRIN2A	0.00431463	1060	1178	0.21386	1.17623	1	GRIN2A	1060, 1076, 1122, 1178	1060	1178	1	1276, 1295, 1351	1276	1351	0.79266
Disease-All	DLG3	0.00909571	102	131	0.25946	0.951353	0.951353	DLG3	102, 131	102	131	0.951353	102, 131	102	131	1
Disease-All	DLG4	0.0225192	520	606	0.29264	0.80476	0.80476	DLG4	520, 595, 606	520	606	0.80476	520, 606	520	606	1
Disease-All	DLG1	0.0171476	67	140	0.65164	1.43361	1	DLG1	67, 68, 125, 140	67	140	1	666, 694, 717	666	717	1
Disease-All	GRIN2B	0.126046	1019	1322	0.79246	1.45284	1	GRIN2B	1019, 1322	1019	1322	1	856, 1322	856	1322	1
Disease-All	DLG24	1	63	63	1	1.57143	1	DLG24	63	63	63	1	13	13	13	1
Disease-All	DLG2	1	506	699	1	1.57143	1	DLG2	506, 699	506	699	1	647, 699	647	699	1
Disease-All	GRIA1	1	371	371	1	1.57143	1	GRIA1	371	371	371	1	40, 280	40	280	1
Disease-All	GRIA2	1	268	268	1	1.57143	1	GRIA2	268	268	268	1	268	268	268	1
Disease-All	GRIN1	1	364	513	1	1.57143	1	GRIN1	364, 513	364	513	1	N/A	N/A	N/A	1
	LBC-SNP distributions
		Poisson ranking P value	Start	End	Extreme distribution P value
LBC-All	GRM1	0.00674365	884	929	0.36217	1.32796	1
LBC-All	GRIN2A	0.00230991	1276	1351	0.07206	0.79266	0.79266
LBC-All	DLG3	0.00909571	102	131	0.26304	1.44672	1
LBC-All	DLG4	0.0827603	520	606	0.82883	1.82343	1
LBC-All	DLG1	0.0149816	666	717	0.48251	1.3269	1
LBC-All	GRIN2B	0.242934	856	1322	0.94879	1.73945	1
LBC-All	DLG24	1	13	13	1	1.57143	1
LBC-All	DLG2	1	647	699	1	1.57143	1
LBC-All	GRIA1	1	40	280	1	1.57143	1
LBC-All	GRIA2	1	268	268	1	1.57143	1
LBC-All	GRIN1	1	N/A	N/A	1	1.57143	1
