# Supplementary material for: Clustered Coding Variants in the Glutamate Receptor Complexes of Individuals with Schizophrenia and Bipolar Disorder
Source: PLoS One. 2011 Apr 29;6(4):e19011. doi: 10.1371/journal.pone.0019011 (PMC3084736; doi:10.1371/journal.pone.0019011)
Supplement: Datasheet S4 — Identities and scores of individuals with concurrent nsSNPs. (XLS) [file pone.0019011.s005.xls]

## Sheet: all
SNPs	Key	score		Nodes	coincident nsSNPs	protein	score per nsSNP	No. SNPs	deleteriousness	number control	number disease	patient IDs
NT_009714.16_6475182	CL	1		-	none	-	-	0	0	140	276	ED0092 LBC F ED0105 LBC M ED0114 LBC M ED0134 LBC M ED0140 LBC F ED0143 LBC M ED0145 LBC F ED0164 LBC M ED0165 LBC F ED0166 LBC M ED0167 LBC M ED0169 LBC F ED0171 LBC M ED0173 LBC F ED0192 LBC M ED0194 LBC F ED0195 LBC M ED0198 LBC F ED0218 LBC M ED0224 LBC M ED0226 LBC F ED0228 LBC M ED0229 LBC F ED0230 LBC M ED0232 LBC F ED0233 LBC F ED0234 LBC F ED0237 LBC F ED0239 LBC F ED0241 LBC F ED0242 LB…
NT_009714.16_6476090	CM	2		CJ	NT_025741.13_50824789	grm1		1	1	1	4	ED0102 LBC M ED0943 SCZ M ED1018 SCZ F ED1023 SCZ M ED1585 BP M
NT_009714.16_6478965	CN	0		CJ,CH,CD,CG	NT_025741.13_50824789 NT_029928.11_1391247 rs2281868 rs6923492	grm1, dlg1, dlg3,grm1	1,3,0,1	4	5	1	0	ED0181 LBC F
NT_009714.16_6777927	CO	1		CJ,CD,CG	NT_025741.13_50824789 rs2281868 rs6923492	grm1, dlg3,grm1	1,0,1	3	2	2	1	ED0109 LBC M ED0600 LBC F ED0892 BP F
NT_009714.16_6778103	CP	0		AH	NT_011669.15_8038780	dlg3		1	3	0	1	ED0965 SCZ M
NT_010393.15_1170125	CQ	1		CH,CB,CC,CD	NT_029928.11_1391247 rs1802668 rs1949471 rs2281868	dlg1,dlg1,dlg1,dlg3	3,2,2,0	4	7	1	0	ED0643 LBC F
NT_010393.15_1170429	CR	1		AX,CG	NT_029928.12_1412397 rs6923492	dlg1,grm1	2,1	2	3	1	1	ED0186 LBC F ED1170 SCZ M
NT_010393.15_1170596	CS	3		AN,CH,CG	NT_025741.13_50812495 NT_029928.11_1391247 rs6923492	grm1,dlg1,grm1	2,3,1	3	9	0	1	ED1464 BP M
NT_010393.15_1170653	CT	0		CD,CF	rs2281868 rs362936	dlg3,grm1	0,0	2	0	1	1	ED0341 LBC F ED0905 BP F
NT_010393.15_1170948	CU	1		AK	NT_024000.16_839448	grin1		1	0	0	1	ED1654 BP F
NT_010393.15_1171115	CV	0		CB,CC,CE,CG	rs1802668 rs1949471 rs2941 rs6923492	dlg1,dlg1,grm1,grm1	2,2,1	4	5	0	1	ED1186 SCZ F
NT_010393.15_1171252	CW	2		CA,CE	rs11797456 rs2941	dlg3,grm1	0,0	2	0	1	0	ED0122 LBC M
NT_010393.15_1171302	CX	3		CF,CG	rs362936 rs6923492	grm1,grm1	0,1	2	1	6	7	ED0148 LBC F ED0244 LBC F ED0362 LBC F ED0439 LBC F ED0466 LBC M ED0613 LBC F ED0977 SCZ M ED1208 SCZ M ED1372 SCZ M ED1396 SCZ M ED1449 BP M ED1451 BP M ED1468 BP M
NT_010393.15_1171354	CY	1		BF	NT_029928.12_1629403	dlg1		1	0	0	1	ED1447 BP M
NT_010393.15_1587119	Cz	2		CR,CG	NT_010393.15_1170429 rs6923492	grin2a,grm1	1,1	2	2	1	0	ED0399 LBC F
NT_010393.15_1587272	AA	0		AS,CH,CC,CD,CG	NT_025741.14_50824408 NT_029928.11_1391247 rs1949471 rs2281868 rs6923492	grm1,grm1,dlg1,dlg3,grm1	0, 3, 2,0,1	5	7	0	1	ED0958 SCZ M
NT_010718.15_6691398	AB	0		BJ,CG	NT_033927.7_14250750 rs6923492	dlg2,grm1	0,1	2	1	0	1	ED1523 BP F
NT_010718.15_6693661	AC	0		AP	NT_025741.13_50812575	grm1		1	3	0	1	ED1383 SCZ M
NT_010718.15_6693694	AD	1		CI,BG,CG	NT_029928.11_1427662 NT_033927.7_13405452 rs6923492	dlg1,lg2,grm1	1,2,1	3	4	1	0	ED0522 LBC M
NT_010718.15_6694367	AE	2		AY	NT_029928.12_1415824	dlg1		1	4	0	1	ED1362 BP M
NT_010718.15_6708779	AF	(exlcuded; see supplementary section 2.3		CH,CF	NT_029928.11_1391247 rs2941	dlg1,grm1	3,0	2	3	0	1	ED1202 SCZ F
NT_011669.15_8038418	AG	3		AH,CD	NT_011669.15_8038418 rs2281868	dlg3,dlg3	3,0	2	3	1	0	ED0101 LBC M
NT_011669.15_8038780	AH	3		BG,CB,CG	NT_033927.7_13405452 rs1802668 rs6923492	dlg2,dlg1,grm1	2,2,1	3	5	1	0	ED0262 LBC M
NT_016354.18_82790818	AI	0		W,C,CG	NT_010393.15_1171252 rs1949471 rs6923492	grin2a,dlg1,grm1	2,2,1	3	5	1	0	ED0569 LBC F
NT_024000.16_835955	AJ	3		AL,CG	NT_025741.13_50730298 rs6923492	grm1,grm1	0,1	2	1	1	0	ED0407 LBC M
NT_024000.16_839448	AK	0		AO,CG	NT_025741.13_50812541 rs6923492	grm1,grm1	0,1	2	3	0	1	ED1176 SCZ F
NT_025741.13_50730298	AL	0		CQ,CG	NT_010393.15_1170125 rs6923492	grin2a, grm1	1,1	2	2	0	1	ED1506 BP F
NT_025741.13_50778000	AM	1		CJ,CD	NT_025741.13_50824789 rs2281868	grm1,dlg3	1,0	2	1	1	0	ED0647 LBC M
NT_025741.13_50812495	AN	5		CN	NT_009714.16_6478965	grin2b		1	0	1	0	ED0366 LBC F
NT_025741.13_50812541	AO	2		BG,CG	NT_033927.7_13405452 rs6923492	dlg2,grm1	2,1	2	3	0	2	ED0963 SCZ M ED1628 BP M
NT_025741.13_50812575	AP	3		BC	NT_029928.12_1541139	dlg1		1	1	0	1	ED1556 BP M
NT_025741.13_50859502	AQ	2		CL,CB	NT_009714.16_6475182 rs1802668	grin2b,dlg1	1,2	2	3	0	1	ED1092 SCZ M
NT_025741.13_50859982	AR	0		CI,CD,CG	NT_029928.11_1427662 rs2281868 rs6923492	dlg1,dlg3,grm1	1,0,1	3	2	2	1	ED0572 LBC F ED0574 LBC F ED1051 SCZ M
NT_025741.14_50824408	AS	0		CD,CG	rs2281868 rs6923492	dlg3,grm1	0,1	2	1	33	17	1
NT_025741.14_50824416	AT	1		AM,CG	NT_025741.13_50778000 rs6923492	grm1, grm1	1,0	2	2	2	0	ED0153 LBC F ED0470 LBC M
NT_029289.10_14036460	AU	1		CH	NT_029928.11_1391247	dlg1		1	3	11	15	ED0094 LBC M ED0163 LBC M ED0175 LBC M ED0238 LBC F ED0249 LBC F ED0274 LBC F ED0313 LBC M ED0314 LBC M ED0517 LBC M ED0537 LBC F ED0563 LBC F ED0935 SCZ M ED1019 SCZ M ED1065 SCZ M ED1124 SCZ M ED1149 SCZ F ED1253 SCZ M ED1419 BP M ED1583 BP M ED1596 BP F ED1598 BP M ED1625 BP F ED1639 BP M ED1664 BP M ED1916 SCZ M ED1942 SCZ M
NT_029289.10_14217134	AV	2		BG,CE	NT_033927.7_13405452 rs2941	dlg2,grm	2,0	2	2	1	0	ED0312 LBC M
NT_029289.10_14228803	AW	4		AE,CH,CI,CE	NT_010718.15_6694367 NT_029928.11_1391247 NT_029928.11_1427662 rs2941	dlg4,dlg1,dlg1grm1	2,3,1,0	4	6	0	1	ED1034 SCZ M
NT_029928.12_1412397	AX	2		CB,CD	rs1802668 rs2281868	dlg1, dlg3	2,0	2	2	4	0	ED0103 LBC F ED0136 LBC F ED0452 LBC F ED0544 LBC F
NT_029928.12_1415824	AY	4		CC,CE	rs1949471 rs2941	dlg1,grm1	2,0	2	2	2	1	ED0263 LBC F ED0474 LBC F ED1165 SCZ M
NT_029928.12_1437622	AZ	3		CC,CB	rs1949471 rs2281868	dlg1,grm1	2,0	2	2	1	8	ED0111 LBC M ED0901 SCZ F ED1044 SCZ F ED1050 SCZ M ED1055 SCZ F ED1083 SCZ M ED1777 SCZ F ED1891 SCZ M ED1937 SCZ M
NT_029928.12_1466112	BA	0		CH,CB,CC,CG	NT_029928.11_1391247 rs1802668 rs1949471 rs6923492	dlg1,dlg1,dlg1,grm1	3,2,2,1	4	8	1	1	ED0453 LBC F ED1349 SCZ M
NT_029928.12_1486821	BB	2		CC,CG	rs1949471 rs6923492	dlg1,grm1	2,1	2	3	18	19	ED0201 LBC M ED0202 LBC M ED0220 LBC M ED0236 LBC M ED0278 LBC M ED0289 LBC F ED0317 LBC F ED0363 LBC F ED0373 LBC F ED0387 LBC M ED0405 LBC M ED0417 LBC F ED0519 LBC M ED0543 LBC M ED0547 LBC M ED0576 LBC M ED0578 LBC F ED0620 LBC F ED0919 SCZ M ED0949 SCZ M ED1000 SCZ M ED1084 SCZ M ED1090 SCZ M ED1133 SCZ M ED1138 SCZ M ED1181 SCZ M ED1190 SCZ F ED1192 SCZ M ED1195 SCZ M ED1248 SCZ M ED1265 SC…
NT_029928.12_1541139	BC	1		AO,BG,CD	NT_025741.13_50812541 NT_033927.7_13405452 rs2281868	grm1,dlg2,dlg3	2,2,0	3	4	1	0	ED0644 LBC F
NT_029928.12_1629343	BD	2		AI,CB,CD	NT_016354.18_82790818 rs1802668 rs2281868	gria2,dlg1,dlg3	0,2,0	3	2	1	0	ED0159 LBC F
NT_029928.12_1629399	BE	2		CB,CC	rs1802668 rs1949471	dlg1,dlg1	2,2	2	4	12	6	ED0256 LBC M ED0259 LBC F ED0290 LBC F ED0295 LBC F ED0418 LBC F ED0427 LBC M ED0468 LBC F ED0481 LBC M ED0484 LBC F ED0523 LBC M ED0568 LBC M ED0570 LBC F ED1105 SCZ M ED1283 SCZ M ED1351 SCZ M ED1399 SCZ M ED1893 SCZ M ED1914 SCZ F
NT_029928.12_1629403	BF	0		CW	NT_010393.15_1171252	grin2A		1	2	0	2	ED0925 SCZ M ED1423 BP M
NT_033927.7_13405452	BG	2		CP,CC,CG	NT_009714.16_6778103 rs1949471 rs6923492	grin2b,dlg1,grm1	0,2,1	3	3	0	1	ED1131 SCZ M
NT_033927.7_13417958	BH	1		CC,CD,CG	rs1949471 rs2281868 rs6923492	dlg1,dlg3,grm1	2,01	3	3	1	5	ED0126 LBC F ED1057 SCZ F ED1060 SCZ M ED1801 SCZ F ED1892 SCZ F ED1918 SCZ M
NT_033927.7_13567112	BI	1		CD,CF,CG	rs2281868 rs362936 rs6923492	dlg3,grm1,grm1	0,0,1	3	1	1	1	ED0324 LBC F ED0894 SCZ F
NT_033927.7_14250750	BJ	0		CI,AY	NT_029928.11_1427662 NT_029928.12_1415824	dlg1,dlg1	1,4	2	5	1	0	ED0121 LBC F
NT_033927.7_14250900	BK	0		CH,CD	NT_029928.11_1391247 rs2281868	dlg1,dlg3	3,0	2	3	5	0	ED0123 LBC M ED0139 LBC F ED0154 LBC F ED0161 LBC M ED0652 LBC M
rs11797456	CA	0		BG	NT_033927.7_13405452	dlg2		1	2	2	2	ED0338 LBC M ED0580 LBC F ED1150 SCZ M ED1642 BP M
rs1802668	CB	2		CT,CH,CD,CG	NT_010393.15_1170653 NT_029928.11_1391247 rs2281868 rs6923492	grin2a,dlg1,dlg3,grm1	0,3,0,1	4	4	1	0	ED0645 LBC M
rs1949471	CC	2		CU,CH,CG	NT_010393.15_1170948 NT_029928.11_1391247 rs6923492	grin2a,dlg1,grm1	1,3,1	3	5	0	1	ED1471 BP F
rs2281868	CD	0		AW,CD	NT_029289.10_14228803 rs2281868	gria1,dlg3	4,0	2	4	0	1	ED0910 BP F
rs2941	CE	0		CE,CG	rs2941 rs6923492	grm1,grm1	0,1	2	1	4	5	ED0376 LBC F ED0440 LBC F ED0478 LBC F ED0592 LBC F ED1052 BP F ED1087 SCZ M ED1243 SCZ M ED1244 SCZ M ED1519 BP F
rs362936	CF	0		CH,CC	NT_029928.11_1391247 rs1949471	dlg1,dlg1	3,2	2	5	1	1	ED0642 LBC M ED0926 SCZ M
rs6923492	CG	1		CI	NT_029928.11_1427662	dlg1		1	1	6	3	ED0258 LBC M ED0264 LBC M ED0321 LBC F ED0488 LBC M ED0552 LBC F ED0640 LBC M ED0900 SCZ F ED0940 SCZ M ED1329 SCZ M
NT_025741.13_50730330	CK	0		BK,CD	NT_033927.7_14250900 rs2281868	dlg2,dlg3	0,0	2	0	1	0	ED0157 LBC F
NT_025741.13_50824789	CJ	1		CY,CC	NT_010393.15_1171354 rs1949471	grin2a,dlg1	1,2	2	3	1	0	ED0627 LBC F
NT_029928.11_1391247	CH	3		AC	NT_010718.15_6693661	dlg4		1	0	0	1	ED1676 BP M
NT_029928.11_1427662	CI	1		CJ,CF	NT_025741.13_50824789 rs362936	grm1,grm1	1,0	2	1	1	1	ED0509 LBC M ED1574 BP F
				CI,CB,CC,CG	NT_029928.12_1437622 rs1802668 rs1949471 rs6923492	dlg1,dlg1,dlg1,grm1	3,2,2,1	4	8	1	0	ED0630 LBC F
				CT,AZ,CC,CG	NT_010393.15_1170653 NT_029928.12_1437622 rs1949471 rs6923492	grin2a,dlg1,dlg1,grm1	0,3,2,1	4	6	0	1	ED1332 SCZ F
				CI,CC,CG	NT_029928.11_1427662 rs1949471 rs6923492	dlg1,dlg1,grm1	1,2,1	3	4	2	0	ED0428 LBC F ED0441 LBC M
				CH,CE,CG	NT_029928.11_1391247 rs2941 rs6923492	dlg1,grm1,grm1	3,0,1	3	4	1	0	ED0459 LBC M
				AD	NT_010718.15_6693694	dlg4		1	1	0	1	ED1621 BP F
				CJ,AX,CC	NT_025741.13_50824789 NT_029928.12_1412397 rs1949471	grm1,dlg1,dlg1	1,2,2	3	5	0	1	ED1075 SCZ M
				CB,CD,CE	rs1802668 rs2281868 rs2941	dlg,dlg3,grm1	2,0,0	3	2	1	0	ED0115 LBC F
				BH,CC,CG	NT_033927.7_13417958 rs1949471 rs6923492	dlg2,dlg1,grm1	1,2,1	3	4	1	0	ED0401 LBC M
				CK,CD,CG	NT_025741.13_50730330 rs2281868 rs6923492	grm1,dlg3,grm1	0,0,1	3	1	1	0	ED0561 LBC F
				CH,CD,CF	NT_029928.11_1391247 rs2281868 rs362936	dlg1,dlg3,grm1	3,0,0	3	3	1	0	ED0104 LBC M
				CD	rs2281868	dlg3		1	0	57	17	ED0093 LBC M ED0095 LBC F ED0096 LBC F ED0097 LBC F ED0099 LBC F ED0110 LBC M ED0117 LBC F ED0119 LBC F ED0128 LBC F ED0130 LBC M ED0135 LBC F ED0137 LBC M ED0141 LBC F ED0142 LBC M ED0149 LBC F ED0151 LBC F ED0152 LBC F ED0155 LBC F ED0158 LBC F ED0179 LBC F ED0180 LBC F ED0184 LBC F ED0187 LBC M ED0188 LBC F ED0197 LBC F ED0203 LBC F ED0211 LBC F ED0212 LBC F ED0215 LBC M ED0217 LBC M ED0280 LB…
				AI	NT_016354.18_82790818	gria2		1	0	0	1	ED1122 SCZ F
				CH,CA	NT_029928.11_1391247 rs11797456	dlg1,dlg3	3,0	2	3	1	0	ED0150 LBC F
				BB,CC	NT_029928.12_1486821 rs1949471	dlg1,dlg1	2,2	2	4	1	0	ED0403 LBC M
				CF	rs362936	grm1		1	0	1	7	ED0223 LBC M ED1102 SCZ M ED1272 SCZ M ED1454 BP F ED1515 BP M ED1975 SCZ M ED1976 SCZ F ED1981 SCZ M
				CD,CE,CG	rs2281868 rs2941 rs6923492	dlg3,grm1,grm1	0,0,1	3	1	2	1	ED0127 LBC F ED0177 LBC F ED1903 SCZ M
				CC,CE,CG	rs1949471 rs2941 rs6923492	dlg1,grm1,grm1	2,0,1	3	3	0	1	ED1194 SCZ M
				CC,CF,CG	rs1949471 rs362936 rs6923492	dlg1,grm1,grm1	2,0,1	3	3	0	1	ED1313 SCZ M
				BH,CD,CG	NT_033927.7_13417958 rs6923492	dlg2,grm1	1,1	2	2	1	0	ED0477 LBC F
				CB,CD,CG	rs1802668 rs2281868 rs6923492	dlg1,dlg3,grm1	2,0,1	3	3	3	1	ED0146 LBC F ED0370 LBC F ED0416 LBC F ED1054 SCZ M
				AE	NT_010718.15_6694367	dlg4		1	2	0	1	ED1085 SCZ F
				CC	rs1949471	dlg1		1	2	21	18	ED0227 LBC M ED0240 LBC M ED0245 LBC F ED0248 LBC F ED0286 LBC F ED0294 LBC F ED0309 LBC M ED0322 LBC F ED0326 LBC M ED0364 LBC M ED0371 LBC F ED0388 LBC F ED0412 LBC F ED0446 LBC M ED0482 LBC F ED0486 LBC F ED0525 LBC M ED0527 LBC M ED0540 LBC F ED0584 LBC F ED0624 LBC M ED0902 SCZ M ED0920 SCZ F ED0951 SCZ F ED0971 SCZ F ED1001 SCZ M ED1010 SCZ F ED1046 SCZ M ED1064 SCZ M ED1143 SCZ M ED1151 SC…
				AY,CF	NT_029928.12_1415824 rs362936	dlg1,grm1	4,0	2	4	1	0	ED0374 LBC F
				AR,CB,CC	NT_025741.13_50859982 rs1802668 rs1949471	grm1,dlg1,dlg1	0,2,2	3	4	1	0	ED0436 LBC M
				CS	NT_010393.15_1170596	grin2a		1	3	1	0	ED0156 LBC F
				CA,CG	rs11797456 rs6923492	dlg3,grm1	0,1	2	1	1	0	ED0443 LBC M
				AB,CG	NT_010718.15_6691398 rs6923492	dlg4,grm1	0,1	2	1	0	1	ED0950 SCZ F
				AE,CG	NT_010718.15_6694367 rs6923492	dlg4,grm1	0,1	2	3	0	1	ED0980 SCZ M
				AC,CD,CG	NT_010718.15_6693661 rs1802668 rs1949471	dlg4,dlg1,grm1	0,2,2	3	4	1	0	ED0235 LBC M
				CZ,CC,CD	NT_010393.15_1587119 rs1949471 rs2281868	grin2a,dlg1,dlg3	2,2,0	3	4	0	1	ED0891 SCZ M
				AT	NT_025741.14_50824416	grm1		1	1	0	1	ED1164 SCZ M
				AB	NT_010718.15_6691398	dlg4		1	0	2	0	ED0185 LBC M ED0553 LBC M
				AI,CG	NT_016354.18_82790818 rs6923492	gria2	0,1	2	1	0	1	ED1011 SCZ M
				BD,CG	NT_029928.12_1629343 rs6923492	dlg1,grm1	2,1	2	3	1	0	ED0365 LBC F
				CH,CF	NT_029928.11_1391247 rs362936	dlg1,grm1	3,0	2	3	1	0	ED0225 LBC F
				CH,CF,CG	NT_029928.11_1391247 rs362936 rs6923492	dlg1,grm1	3,0,1	3	4	1	1	ED0450 LBC F ED1935 SCZ M
				CW,AX,CG	NT_010393.15_1171252 NT_029928.12_1412397 rs6923492	grin2a,dlg1,grm1	2,2,1	3	5	0	1	ED1445 BP F
				BE,CG	NT_029928.12_1629399 rs6923492	dlg1,grm1	2,1	2	3	0	1	ED1491 BP M
				AQ,CB,CC	NT_025741.13_50859502 rs1802668 rs1949471	grm1,dlg1,dlg1	2,2,2	3	6	1	0	ED0413 LBC F
				BJ	NT_033927.7_14250750	dlg2		1	0	0	1	ED1352 SCZ M
				CJ,CD,CG	NT_025741.13_50824789 rs1949471 rs2281868 rs6923492	grm1,dlg1,dlg3,grm1	1,2,0,1	4	4	0	1	ED1058 SCZ M
				CA	rs11797456	dlg3		1	0	0	2	ED1269 SCZ M ED1360 SCZ M
				CM,CH,CB,CG	NT_009714.16_6476090 NT_029928.11_1391247 rs1802668 rs6923492	grin2b,dlg1,dlg1,grm1	2,3,2,1	4	8	0	1	ED1627 BP F
				CB,CC,CG	rs1802668 rs1949471 rs6923492	dlg1,dlg1,grm1	2,2,1	3	5	7	16	ED0332 LBC F ED0343 LBC F ED0382 LBC M ED0411 LBC M ED0471 LBC M ED0548 LBC F ED0638 LBC F ED0913 SCZ M ED0915 SCZ M ED0939 SCZ M ED0948 SCZ M ED0967 SCZ F ED0986 SCZ M ED0996 SCZ F ED1009 SCZ F ED1025 SCZ F ED1070 SCZ M ED1094 SCZ M ED1155 SCZ M ED1175 SCZ M ED1184 SCZ F ED1251 SCZ M ED1346 SCZ F
				AE,CB,CC,CG	NT_010718.15_6694367 rs1802668 rs1949471 rs6923492	dlg4,dlg1,dlg1,grm1	2,2,2,1	4	7	1	0	ED0216 LBC M
				CH,CG	NT_029928.11_1391247 rs6923492	dlg1,grm1	3,1	2	4	9	16	ED0176 LBC M ED0189 LBC M ED0206 LBC M ED0210 LBC F ED0268 LBC F ED0269 LBC F ED0282 LBC F ED0315 LBC M ED0567 LBC M ED0897 SCZ M ED1080 SCZ F ED1147 SCZ M ED1173 SCZ M ED1237 SCZ F ED1266 SCZ M ED1306 SCZ M ED1314 SCZ M ED1316 SCZ M ED1355 SCZ M ED1373 SCZ F ED1393 SCZ M ED1406 SCZ M ED1457 BP F ED1509 BP M ED1565 BP F
				CH,CB,CG	NT_029928.11_1391247 rs1802668 rs6923492	dlg1,dlg1,grm1	3,2,1	3	6	0	1	ED1508 BP F
				CA	NT_029928.12_1412397	dlg1		1	2	0	2	ED1635 BP M ED1681 BP M
				BB,CB	NT_029928.12_1486821 rs1802668	dlg1,dlg1	2,2	2	4	0	1	ED1661 BP M
				AR,CI,CD	NT_025741.13_50859982 NT_029928.11_1427662 rs2281868	grm1,dlg1,dlg3	0,1,0	3	1	2	0	ED0113 LBC F ED0174 LBC M
				CB,CG	rs1802668 rs6923492		2,1	2	3	1	13	ED0107 LBC F ED0942 BP M ED1188 SCZ F ED1232 SCZ M ED1300 SCZ M ED1440 BP M ED1448 BP M ED1531 BP M ED1533 BP F ED1542 BP F ED1543 BP F ED1551 BP F ED1948 SCZ M ED1963 SCZ F
				CB,CC,CE	rs1802668 rs1949471 rs2941	dlg1,dlg1,grm1	2,2,0	3	4	1	0	ED0458 LBC F
				AL,CG	NT_025741.13_50730298 rs1949471 rs6923492	grm1,dlg1,grm1	0,2,1	3	3	1	0	ED0589 LBC M
				CJ,CC,CG	NT_025741.13_50824789 rs1949471 rs6923492	grm1,dlg1,grm1	1,2,1	3	4	1	3	ED0310 LBC M ED1028 SCZ F ED1179 SCZ M ED1339 SCZ F
				CH,CD	NT_029928.11_1427662 rs2281868	dlg1,dlg3	1,0	2	1	3	1	ED0120 LBC F ED0182 LBC F ED0209 LBC M ED1921 SCZ M
				CL,CG	NT_009714.16_6475182 rs6923492	grin2b,grm1	1,1	2	2	1	0	ED0131 LBC F
				AA,CB,CC,CF	NT_010393.15_1587272 rs1802668 rs1949471 rs362936	grin2a,dlg1,dlg1,grm1	0,2,2,0	4	4	0	1	ED1263 SCZ M
				CV	NT_010393.15_1171115	grin2a		1	0	0	1	ED1193 SCZ M
				CE	rs2941	grm1		1	0	6	15	ED0277 LBC F ED0301 LBC F ED0328 LBC M ED0330 LBC F ED0402 LBC M ED0585 LBC F ED0923 SCZ F ED0972 SCZ M ED1003 SCZ F ED1107 SCZ M ED1108 SCZ M ED1234 BP F ED1341 SCZ F ED1371 SCZ M ED1380 SCZ F ED1391 SCZ M ED1452 BP F ED1526 BP M ED1580 BP F ED1951 SCZ M ED1974 SCZ F
				CJ,CG	NT_025741.13_50824789 rs6923492	grm1,grm1	1,1	2	2	3	10	ED0254 LBC F ED0448 LBC F ED0494 LBC F ED1114 SCZ F ED1152 SCZ F ED1213 SCZ M ED1238 SCZ M ED1408 BP M ED1510 BP M ED1524 BP F ED1529 BP F ED1972 SCZ M ED1978 SCZ M
				AJ	NT_024000.16_835955	grin1		1	3	0	1	ED0928 SCZ F
				CJ,CB,CC,CG	NT_025741.13_50824789 rs1802668 rs1949471 rs6923492	grm1,dlg1,dlg1,grm1	1,2,2,1	4	6	1	0	ED0460 LBC F
				BA,CB,CC,CD,CG	NT_029928.12_1466112 rs1802668 rs1949471 rs2281868 rs6923492	dlg1,dlg1,dlg1,grm1	0,2,2,0,1	5	5	0	1	ED1897 SCZ F
				CB,CE	rs1802668 rs2941	dlg1,grm1	2,0	2	2	1	1	ED0118 LBC F ED1235 SCZ F
				CB,CC,CD	rs1802668 rs1949471 rs2281868	dlg1,dlg1,dlg3	2,2,0	3	4	1	1	ED0637 LBC F ED0914 SCZ M
				CD,CE	rs2281868 rs2941	dlg3,grm1	0,0	2	0	3	3	ED0138 LBC F ED0172 LBC M ED0612 LBC F ED1049 SCZ M ED1069 SCZ M ED1930 SCZ F
				AD,CH	NT_010718.15_6693694 NT_029928.11_1391247	dlg4,dlg1	1,3	2	4	0	1	ED1672 BP F
				B,C,D,G	rs1802668 rs1949471 rs2281868 rs6923492	dlg1,dlg1,dlg3,grm1	2,2,0,1	4	5	0	2	ED1040 SCZ M ED1789 SCZ F
				CI,CG	NT_029928.11_1427662 rs6923492	dlg2,grm1	1,1	2	2	5	7	ED0091 LBC M ED0306 LBC F ED0311 LBC F ED0456 LBC M ED0492 LBC F ED0945 SCZ F ED1223 SCZ F ED1354 SCZ M ED1387 SCZ M ED1388 SCZ M ED1899 SCZ F ED1944 SCZ M
				AZ,CC,CG	NT_029928.12_1437622 rs1949471 rs6923492	dlg1,dlg1,grm1	3,2,1	3	6	1	0	ED0558 LBC F
				CO	NT_009714.16_6777927	grin2b		1	1	1	0	ED0098 LBC M
				CL,CC,CG	NT_009714.16_6475182 rs1949471 rs6923492	grin2b,dlg1,grm1	1,2,1	3	4	0	1	ED1012 SCZ M
				AO	NT_025741.13_50812541	grm1		1	2	0	1	ED1578 BP M
				CJ,BI,CB,CG	NT_025741.13_50824789 NT_033927.7_13567112 rs1802668 rs6923492	grm1, dlg2,dlg1,grm1	1,1,2,1	4	5	0	1	ED1217 SCZ F
				CH,CD,CG	NT_029928.11_1391247 rs2281868 rs6923492	dlg1,dlg3,grm1	3,0,1	3	4	1	3	ED0372 LBC F ED1906 SCZ M ED1908 SCZ M ED1929 SCZ F
				CH,CC,CG	NT_029928.11_1391247 rs1949471 rs6923492	dlg1,dlg1,grm1	3,2,1	3	6	2	1	ED0506 LBC M ED0562 LBC F ED1922 SCZ M
				CJ,CH	NT_025741.13_50824789 NT_029928.11_1391247	grm1,dlg1	1,3	2	4	0	1	ED1545 BP M
				AV,CC	NT_029289.10_14217134 rs1949471	gria1,dlg1	2,2	2	4	1	0	ED0530 LBC M
				CD	rs1802668	dlg1		1	2	3	15	ED0299 LBC M ED0606 LBC M ED0635 LBC M ED0970 SCZ M ED1139 SCZ M ED1288 SCZ M ED1356 BP F ED1535 BP M ED1561 BP M ED1597 BP F ED1599 BP F ED1648 BP M ED1666 BP F ED1680 BP M ED1694 BP F ED1941 SCZ M ED1954 SCZ F ED1965 SCZ M
				CX,CG	NT_010393.15_1171302 rs6923492	grin2a,grm1	3,1	2	4	0	1	ED1098 SCZ F
				CJ,CI,CD	NT_025741.13_50824789 NT_029928.11_1427662 rs2281868	grm1,dlg1,dlg3	1,1,0	3	2	1	0	ED0536 LBC F
				CC,CF	rs1949471 rs362936	dlg1,grm1	2,0	2	2	1	0	ED0304 LBC M
				CG	rs6923492	grm1		1	1	97	182	ED0106 LBC M ED0108 LBC F ED0125 LBC M ED0133 LBC F ED0144 LBC M ED0147 LBC F ED0168 LBC M ED0170 LBC M ED0183 LBC F ED0190 LBC F ED0193 LBC M ED0196 LBC M ED0204 LBC F ED0207 LBC M ED0219 LBC M ED0221 LBC M ED0222 LBC F ED0231 LBC F ED0243 LBC M ED0246 LBC F ED0252 LBC M ED0260 LBC F ED0267 LBC F ED0270 LBC F ED0272 LBC F ED0275 LBC F ED0276 LBC M ED0283 LBC F ED0284 LBC F ED0287 LBC F ED0292 LB…
				AU,CD	NT_029289.10_14036460 rs2281868	gria1,DLG3	1,0	2	1	1	0	ED0100 LBC F
										398	490
