# Supplementary material for: Clustered Coding Variants in the Glutamate Receptor Complexes of Individuals with Schizophrenia and Bipolar Disorder
Source: PLoS One. 2011 Apr 29;6(4):e19011. doi: 10.1371/journal.pone.0019011 (PMC3084736; doi:10.1371/journal.pone.0019011)
Supplement: Datasheet S8 — Table 1: List of protein-protein interactions used in linear regression analysis (see section 3.8 of the supplementary information). Table 2: Lists for each gene the number (calculated using Table 1) of interactions the protein (encoded by the gene) makes with the 10 hub proteins. (XLS) [file pone.0019011.s009.xls]

## Sheet: table1
Gene 1	Gene 2	PMIDS
ACTN2	ACTN4	15345047|11724819
ACTN2	CAMK2A	16120608
ACTN2	DISC1	12812986|7538672
ACTN2	DLG1	12860415|9187653
ACTN2	DLG4	12435606|7729427
ACTN2	GRIN1	15657099|9009191|9952395|9728925
ACTN2	GRIN2B	9009191|16120608|7729427
ACTN4	CAMK2A	11160423
ACTN4	CAMK2B	11160423
ACTN4	GRB2	15345047|12577067
ACTN4	GSN	11733011
ACTN4	PTPN11	11382784
ACTN4	TJP1	16944923
AKAP5	ATP1A1	11029299
AKAP5	DLG1	10939335
AKAP5	DLG4	10939335
AKAP5	PPP3CA	9202019
AKAP5	PRKAR2B	1333841
AKAP5	PRKCB1	9202019
AKAP5	PRKCE	9202019
AKAP9	GRIN1	9482789
AKAP9	PPP2CA	10358086
AKAP9	PRKAR2B	10390370
AKAP9	PRKCE	10945988
APPL	PIK3CA	10490823
ARVCF	TJP1	15456900
ATP2B4	CASK	12511555
ATP2B4	DLG1	9430700
ATP2B4	DLG2	9430700
ATP2B4	DLG3	9430700
ATP2B4	DLG4	9430700
ATP2B4	NOS1	11591728
ATP2B4	PPP3CA	15955804
ATP2B4	SRC	12540962|9182531
CACNG2	DLG1	11140673
CACNG2	DLG2	11140673
CACNG2	DLG3	11140673
CACNG2	DLG4	11140673
CACNG2	GRIA1	11140673
CACNG2	GRIA2	11140673
CAMK2A	CAMK2B	9813071
CAMK2A	DLG1	12933808
CAMK2A	GRIN1	10077668
CAMK2A	GRIN2A	9751209
CAMK2A	GRIN2B	9751209
CAMK2A	MPDZ	15312654
CAMK2A	MYO5A	10336484
CAMK2A	NOS1	10400690
CAMK2A	SYNGAP1	9620694
CAMK2B	GRIN2A	12147342
CAMK2B	GRIN2B	11306676|16436603|12147342|8940188
CAMK2B	PLCB3	11325525
CASK	DLG1	10993877|12351654|15024025|14960569
CASK	DLG4	12151521
CASK	GRIK2	12151522
CASK	GRIN2A	16637659
CASK	LIN7A	15345047|9753324|14960569|15024025
CASK	NF1	11356864
CASK	Rab3A	11377421
CDH2	CTNNB1	10235639
CDH2	GRIK2	12151522
CDH2	RICS	12531901
CENTG1	HOMER1	14528310
CENTG1	PLCG1	11823862
CIT	DLG4	9870942
CIT	RAC1	8543060
CLTC	DNM1	10336464
CLTC	YWHAG	15324660
CRIPT	DLG1	12070168
CRIPT	DLG2	12070168|9581762
CRIPT	DLG3	12070168|11937501
CRIPT	DLG4	15657099|11744724|9581762
CTNNB1	DLG1	9512503
CTNNB1	GRIK2	12151522
CTNNB1	GSK3B	15892868|12051714|12000790|11818547|12114015|9482734
CTNNB1	LIN7A	10921879
CTNNB1	PIK3CA	10477752
CTNNB1	RICS	12531901
CTNNB1	SLC9A3R1	12830000
CTNNB1	SRC	11279024
CTNNB1	TJP1	8636221
CTTN	DNM1	11018064
CTTN	GRB2	16189514|15345047|11439336|12577067
CTTN	RAC1	9683637
CTTN	SHANK2	9742101
CTTN	SRC	9683637
CTTN	TJP1	9792678
DLG1	DLG2	12351654
DLG1	DLG3	12351654
DLG1	DLGAP1	9115257
DLG1	GRIA1	11567040|9677374
DLG1	GRIK2	9808460
DLG1	GRIN2A	10336672
DLG1	GRIN2B	10336672
DLG1	KALRN	11182094
DLG1	LIN7A	15024025|14960569
DLG1	MPP2	12351654
DLG2	DLG4	8755482
DLG2	GRIN1	16351748|10862698
DLG2	GRIN2A	10336672
DLG2	GRIN2B	10336672
DLG2	KALRN	11182094
DLG2	LIN7A	9753324
DLG2	NOS1	8922396
DLG3	DLG4	10026200
DLG3	DLGAP1	9115257
DLG3	GRIK2	9808460
DLG3	GRIN1	16351748|10862698
DLG3	GRIN2A	10336672
DLG3	GRIN2B	10336672
DLG3	KALRN	11182094
DLG3	LIN7A	9753324
DLG3	PTK2B	12576483
DLG3	SYNGAP1	9581761
DLG4	DLGAP1	10488079
DLG4	DLGAP2	9286858|9115257
DLG4	DLGAP3	9115257
DLG4	GRIK2	9808460
DLG4	GRIN1	16351748|15030493|12068077|11506858|9009191|14732708|9502803
DLG4	GRIN2A	10336672
DLG4	GRIN2B	10336672
DLG4	KALRN	11182094
DLG4	LIN7A	10341223
DLG4	NOS1	8922396
DLG4	PTK2B	12576483
DLG4	RICS	12531901
DLG4	SHANK2	10527873
DLG4	SIPA1L1	11502259
DLG4	SRC	9892651
DLG4	SYNGAP1	9620694
DLGAP1	DLGAP2	9221768
DLGAP1	GRIN2A	9286858
DLGAP1	INA	10759891
DLGAP1	NEF3	10759891
DLGAP1	NEFL	10759891
DLGAP1	SHANK2	10527873
DLGAP2	NOS1	10824095
DNM1	GRB2	8022809
DNM1	GRIN1	16351748|10862698
DNM1	PLCG1	15252117
DNM1	PPP3CA	10473536
DNM1	PRKCB1	8063723
DNM1	PRKCE	8063723
DNM1	PRKCG	8063723
DNM1	SNAP25	10373452
DNM1	SRC	9539797
FUS	GRIN1	16351748|10862698
FUS	GSK3B	17353931
GAP43	PRKCB1	8694767|2140056
GIT1	PLCG1	14523024
GIT1	SRC	14523024
GIT1	YWHAG	15324660
GRB2	GSN	12577067
GRB2	HRAS	15608231|11352655
GRB2	IRS1	11259577
GRB2	MAPK3	15608231|15892868
GRB2	PIK3CA	7759531
GRB2	PLCG1	9281317|12514734
GRB2	PPP3CA	12577067
GRB2	PTK2B	10329689
GRB2	PTPN11	8702859
GRB2	SRC	16189514|15892868|11964172|9016807
GRIA1	GRIA2	15858065
GRIA1	GRIK2	10358037
GRIA1	HOMER1	9808458|11418862|9069287
GRIA2	NSF	9697855
GRIN1	GRIN2A	10480938
GRIN1	GRIN2B	10480938
GRIN1	NEFL	9425014
GRIN1	TJP1	16351748|10862698
GRIN2A	LIN7A	10341223
GRIN2A	PLCG1	9231720
GRIN2A	PTK2B	11478920
GRIN2A	RICS	12531901
GRIN2A	SRC	10458595
GRIN2B	LIN7A	10341223
GRIN2B	PIK3CA	10620012
GRIN2B	PLCG1	9231720
GRIN2B	PRKCB1	11306676|8940188|12147342
GRIN2B	PRKCG	11306676|12147342|8940188
GRIN2B	PTPN11	10381539
GRIN2B	RICS	12857875|12531901
GRIN2B	SRC	10458595
GRIN2B	SYNGAP1	9620694
GRM1	HOMER1	10433269
GRM5	HOMER1	11007880
GRM5	PRKCB1	15894802
GRM5	PRKCE	15894802
GRM5	PRKCG	15894802
GSK3B	MYO5A	15657099
GSK3B	NF1	15657099
GSK3B	PRKCB1	16189514|1324914
GSN	PIK3CA	9565618
GSN	PTK2B	12578912
GSN	SRC	9565618
HOMER1	SHANK2	15632121
HOMER1	STX1A	10833436
HRAS	IRS1	15608231
HRAS	MAPK3	15608231
HRAS	NF1	9219873
HRAS	PIK3CA	9931431
HRAS	RAF1	9931431
HRAS	SRC	9020108
HRAS	SYNGAP1	9620694
IRS1	MAPK3	15608231
IRS1	PDPK1	15802620
IRS1	PIK3CA	9624169
IRS1	PRKCG	15364919
IRS1	PTPN11	15892868|8505282|7935386|9756938
IRS1	YWHAE	9312143
IRS1	YWHAG	15324660
IRS1	YWHAZ	9312143
KALRN	RAC1	9915831
KALRN	TJP1	11182094
LMNB1	PRKCB1	16189514|11901153|8034666
MAPK3	PRKCE	11350735
MAPK3	PTPN11	8197172
MAPK3	RAF1	15608231|15892868|9446616
MPDZ	SYNGAP1	15312654
MYO5A	NEFL	12403814
MYO5A	NF1	15657099
NEFL	PPP2CA	9387859
NEFL	YWHAG	15324660
NEK6	NSF	17353931
NSF	RAB6A	11062069
NSF	SNAP25	9693958
NSF	STX1A	7622514
PDPK1	PRKCB1	16189514|11376011
PDPK1	PRKCE	10945988|11062054|12640464
PDPK1	PTK2B	14585963
PDPK1	SRC	11481331
PDPK1	YWHAE	15345047|16351748
PDPK1	YWHAH	12177059
PIK3CA	PTPN11	10386953
PIK3CA	RAC1	9148763
PIK3CA	SRC	10830300
PIK3CA	YWHAZ	10887121
PLCG1	PTPN11	15563458
PLCG1	RAF1	8084603
PLCG1	RICS	12454018
PLCG1	SRC	8885868|8657103|7682059|1689310|7510703
PRKCB1	PTPN11	11781100
PRKCB1	STXBP1	12519779|8631738|12950453
PRKCB1	YWHAG	10433554
PRKCE	RAF1	11358964
PRKCE	SRC	11834516
PRKCG	STXBP1	8631738|12519779|12950453
PRKCG	YWHAG	10433554
PTK2B	PTPN11	10722671
PTK2B	SRC	8849729
PTPN11	SRC	14687660
PTPN11	YWHAZ	15345047|16351748
RAF1	SRC	9020108
RAF1	YWHAE	16189514|7644510|8702721
RAF1	YWHAG	16189514|10433554|8702721|17353931
RAF1	YWHAH	15657099|8702721
RAF1	YWHAZ	10998357
RICS	SRC	12454018
SNAP25	STX1A	10928452
SRC	YWHAE	16189514|8702721
SRC	YWHAG	16189514|8702721
SRC	YWHAH	8702721
YWHAE	YWHAG	12507503
YWHAE	YWHAH	7615088|12507503
YWHAE	YWHAZ	11912194
YWHAG	YWHAH	15324660
YWHAH	YWHAZ	14676191

## Sheet: table 2
gene	N hub interactors (primary/secondary)
SHANK2	9
GRIK2	9
CACNG2	9
LIN7A	8
KALRN	8
DLGAP1	8
CTNNB1	8
CRIPT	8
CASK	8
CAMK2A	8
ATP2B4	8
AKAP5	8
ACTN2	8
TJP1	7
SYNGAP1	7
SRC	7
RICS	7
PTPN11	7
PTK2B	7
PLCG1	7
PIK3CA	7
NOS1	7
NEFL	7
DLGAP2	7
CAMK2B	7
SIPA1L1	6
PRKCG	6
PRKCB1	6
MPP2	6
MPDZ	6
FUS	6
DNM1	6
DLGAP3	6
CIT	6
CDH2	6
AKAP9	6
RAC1	5
PRKCE	5
PPP3CA	5
HOMER1	5
GRB2	5
ACTN4	5
YWHAG	4
PDPK1	4
NEF3	4
MYO5A	4
INA	4
HRAS	4
GSN	4
DISC1	4
CTTN	4
CENTG1	4
YWHAH	3
YWHAE	3
STX1A	3
RAF1	3
Rab3A	3
PRKAR2B	3
NF1	3
GSK3B	3
GRM5	3
GIT1	3
SNAP25	2
PLCB3	2
NSF	2
ATP1A1	2
YWHAZ	1
STXBP1	1
SLC9A3R1	1
RAB6A	1
PPP2CA	1
NEK6	1
MAPK3	1
LMNB1	1
IRS1	1
GAP43	1
CLTC	1
ARVCF	1
APPL	1
